# Supplementary material for: Functional evaluation of a homologue of plant rapid alkalinisation factor (RALF) peptides in Fusarium graminearum
Source: PubMed Central journal article supplement — Fungal Biol. 2020 Sep;124(9):753–65. doi: 10.1016/j.funbio.2020.05.001 (PMC7487784; doi:10.1016/j.funbio.2020.05.001), 2020-09
Supplement: mmc2.pdf [file mmc2.pdf]

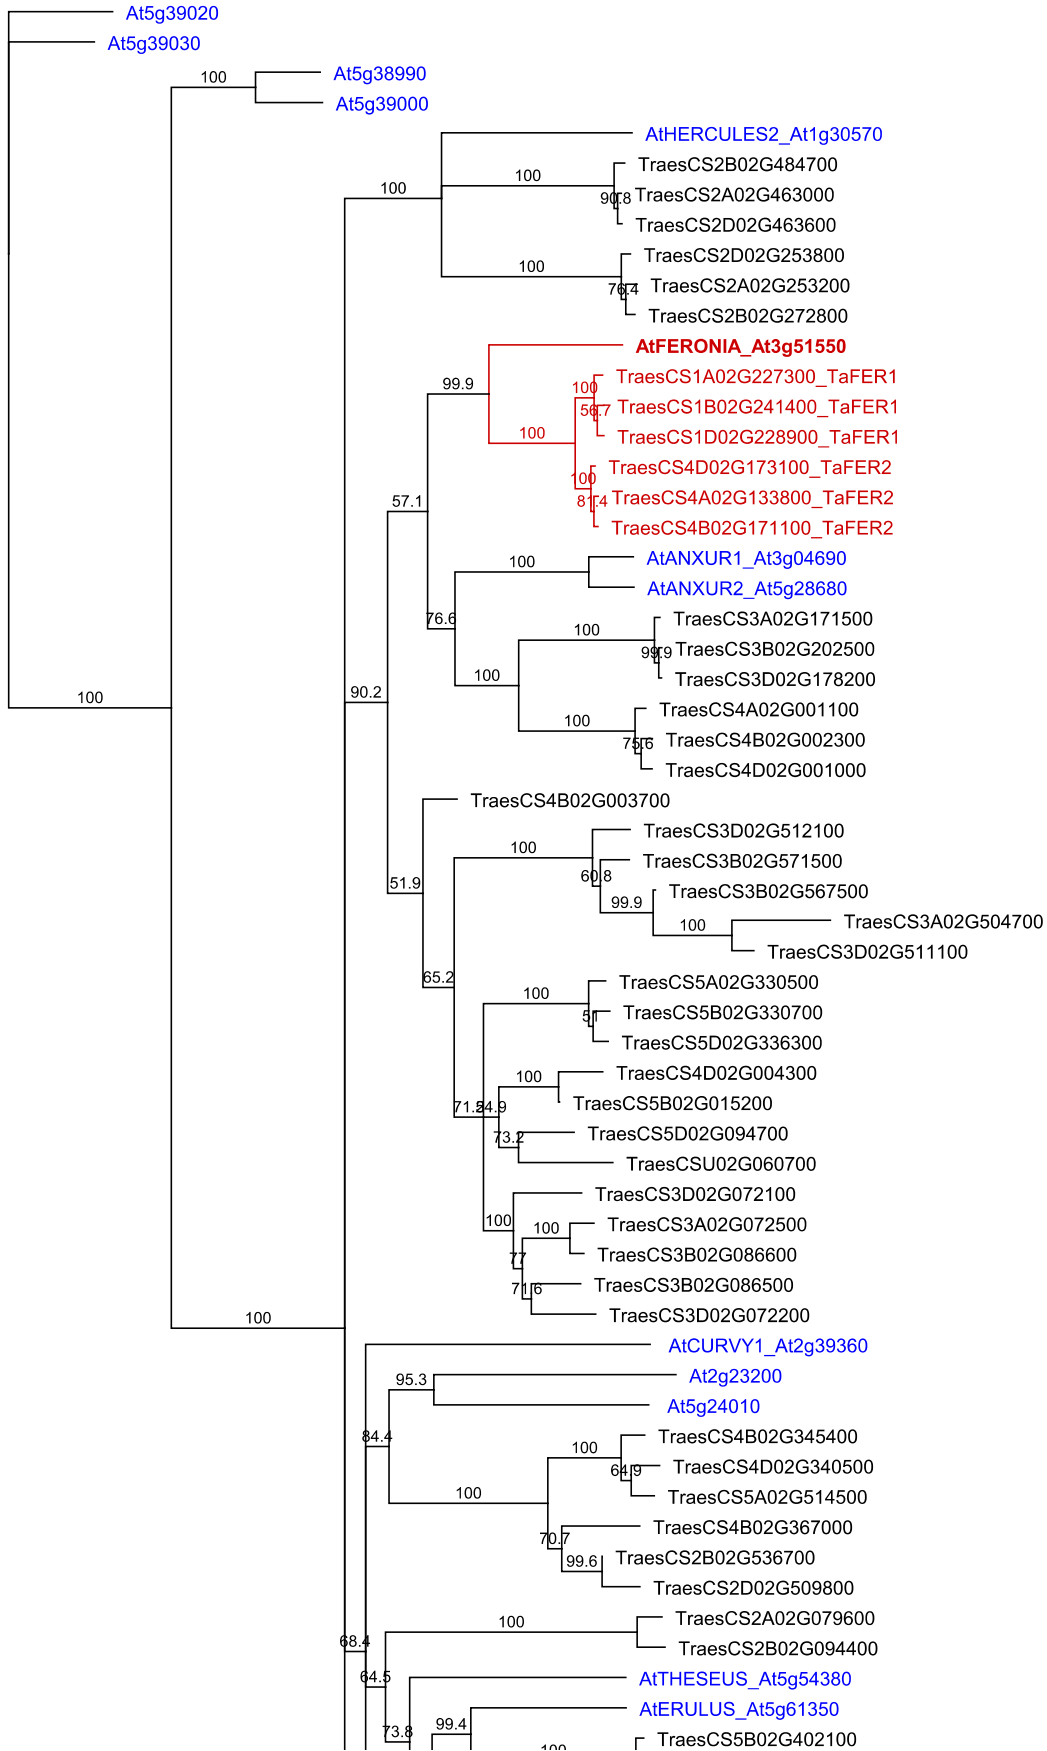

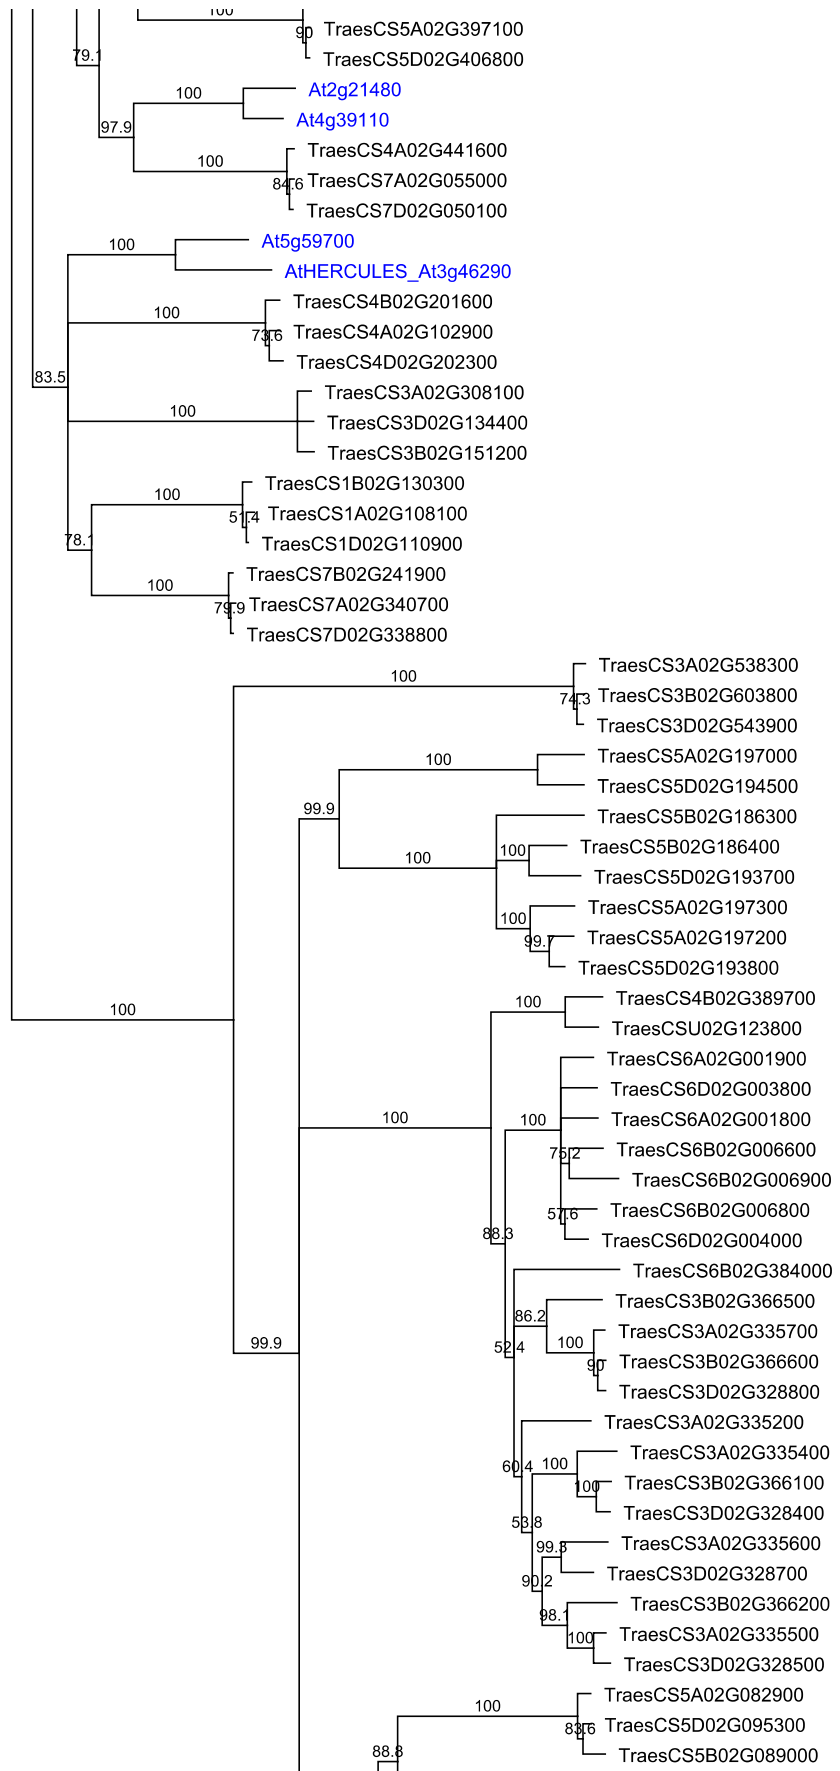

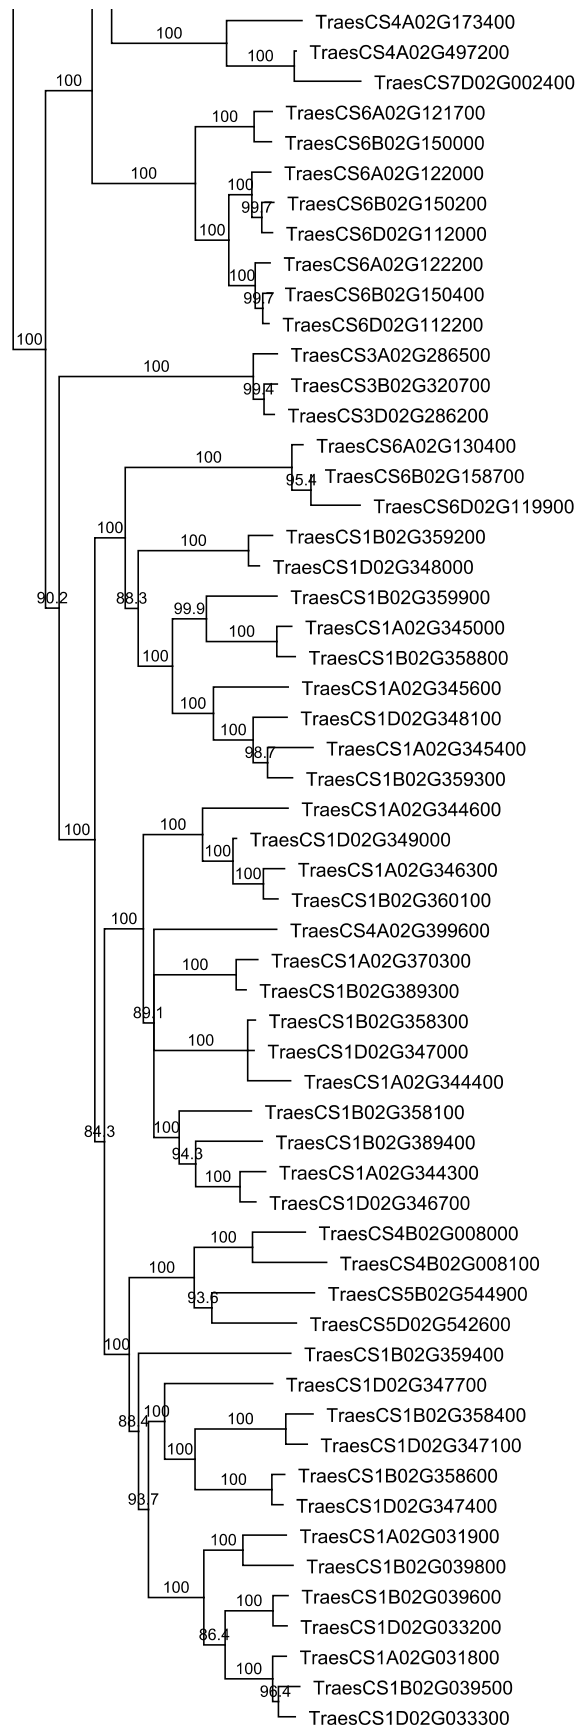

1.0

Figure S3 Expanded Neighbour-joining (NJ) tree based on the wheat (*T. aestivum*) and Arabidopsis protein sequences containing both predicted kinase-like (PF07714) and malectin-like (PF12819) domains. The numbers indicate the NJ bootstrap values for 1000 replicates. The protein name in blue indicates the Arabidopsis Feronia (AtFER). The names in red indicate the wheat sequences closely related to AtFER (TaFER1 and TaFER2). The names in black are the other members of Arabidopsis and wheat Feronia families.
